# Supplementary material for: Evaluation of an Environmental Nutrition Intervention at the 2018 Commonwealth Games
Source: MDPI journal article supplement (doi:10.3390/nu15214678), 2023-11-04
Supplement: s1 [file s1]

**Table S1; Quality assurance comments**

Comments on the quality of the food, proportions presented per theme.

| Theme                       |             | Positive comments                                                                                                                                                                                                                    | n (%)         | Neutral comments                                                                                                                                        | n (%)        | Negative comments                                                                                                                                                                                                                    | n (%)       |
|-----------------------------|-------------|--------------------------------------------------------------------------------------------------------------------------------------------------------------------------------------------------------------------------------------|---------------|---------------------------------------------------------------------------------------------------------------------------------------------------------|--------------|--------------------------------------------------------------------------------------------------------------------------------------------------------------------------------------------------------------------------------------|-------------|
| Sensory properties<br>n=560 | Taste       | “tastes nice” (kangaroo pie, orange almond cake)<br>“very tasty” (jerk chicken, beef kebab)                                                                                                                                          | 130<br>(23.2) | “tasted fine” (buttermilk pancake)<br>“tastes ok” (black pudding)<br>“tastes sweet” (potato and pumpkin curry, ketchup chicken, waffles, Rajmah masala) | 59<br>(10.5) | “Really disgusting after taste. Don’t know if this is how it is meant to taste.” (Plain congee)<br>“Bland” (sauteed mushroom, stir fry veg, noodles, hollow rice, coleslaw, salad, chickpea burger, African buffalo meat stew halal) | 47<br>(8.4) |
|                             | Appearance  | “looks appealing” (waffles, angus rump steak, sauteed mushroom)<br>“Looks nice and fresh” (assorted steam veg, steamed broc, green bean, fruit salad, Margarett pizza, meat lovers pizza, salad, bone broth, okra with tomato gumbo) | 90<br>(16.1)  | “looks as expected” (porridge, pork schnitzel)<br>“looked ok” (grilled chicken breast)                                                                  | 29<br>(5.1)  | “looks a little shrivelled up” (Steamed greens)<br>“Snow peas looked really cooked and just like the ones they had on for hot service last night” (rice noodle salad)                                                                | 29<br>(5.1) |
|                             | Texture     | “Not chewy, nice and crunchy batter” Chicken Schnitzel<br>“Not too chewy” (Slow cooked beef ragout)                                                                                                                                  | 74<br>(13.2)  | “Pastry texture, quite crunchy and then chewy” (Roti)<br>“Sauce is thick” (house made bake beans)                                                       | 27<br>(4.8)  | “Very tough, dry and chewy” (Smoked sliced biltong)                                                                                                                                                                                  | 43<br>(7.7) |
|                             | Smell       | “Smells great” (jerk chicken)<br>“Smells nice” (Lamb chickpea and spinach curry)<br>“good smell” (Soy braised pork stew)                                                                                                             | 16<br>(2.8)   | “strong Banana Smell” (banana smoothie)<br>“No smell” (Nasi Goreng)<br>“Smells like coconut” (Coconut vegetable curry)                                  | 10<br>(1.8)  |                                                                                                                                                                                                                                      | 0<br>(0)    |
|                             | Temperature | “temperature good” (Spinach and ricotta cannelloni)                                                                                                                                                                                  | 1<br>(0.1)    | “temperatures ok” (chicken kebab)                                                                                                                       | 1<br>(0.1)   | “Dry but could be due to meat being cold before eating” (Turkey Steak)<br>“(may be due to tasting when dish is cold)” (Honey roasted pumpkin)                                                                                        | 4<br>(0.7)  |

|                           |                         |                                                                                                                                                                                                                                           |              |                                                                                                                                                                |            |                                                                                                                                                                                                                                                                                                                                                                                      |              |
|---------------------------|-------------------------|-------------------------------------------------------------------------------------------------------------------------------------------------------------------------------------------------------------------------------------------|--------------|----------------------------------------------------------------------------------------------------------------------------------------------------------------|------------|--------------------------------------------------------------------------------------------------------------------------------------------------------------------------------------------------------------------------------------------------------------------------------------------------------------------------------------------------------------------------------------|--------------|
| Food preparation<br>n=165 | Cooking technique       | “well cooked” (buttermilk pancake, jerk chicken, African smoked fish, bacon, grilled barramundi, chicken breast)                                                                                                                          | 45<br>(27.2) | “Very tough, dry and chewy but nicely smoked” (Smoked sliced biltong)<br>“It looks and tastes fried, Likely wrong card or wrong item” (Grilled chicken breast) | 2<br>(1.2) | “slightly undercooked” (buttermilk pancake)<br>“overcooked” (kangaroo, calamari)                                                                                                                                                                                                                                                                                                     | 26<br>(15.7) |
|                           | Oil content of food     | “not too oily” (pesto pasta, bacon, baked salmon, roasted root vegetable)                                                                                                                                                                 | 8<br>(4.8)   | “I think coconut oil or coconut cream is on it?” (Fried plantain)<br>“Oil added not on card” (sweet potato)                                                    | 2<br>(1.2) | “very oily” (Chicken chipolata, grilled chicken, roasted eggplant, roasted root vegetables, Sauteed potato, chicken rendang, chicken tikka masala)<br>“looks oily” (kangaroo sausage)                                                                                                                                                                                                | 24<br>(14.5) |
|                           | Ingredient ratio/amount | “plenty of herbs and capsicum” (Egg white omelette)<br>“plenty of ingredients” (BBQ chicken, grilled capsicum, red onion and coriander pizza)<br>“I like that I can see the different vegetables inside.” (Beef bourguignon with shallot) | 8<br>(4.8)   | “Contains whole egg” (quiche Lorraine)                                                                                                                         | 1<br>(0.6) | “Would suggesting using one other colours vegetable, green capsicum was only used and looks a bit dull” (seafood kebab)<br>“small amount of Tim Tam smash” (Chocolate fudge cake with smashed Tim Tams)<br>“not much mixed in such as prawn, chicken, bean shoots, capsicum, basically just noodles” “Minimal toppings”                                                              | 49<br>(29.7) |
| Service<br>n=14           | Plating                 |                                                                                                                                                                                                                                           | 0<br>(0)     |                                                                                                                                                                | 0<br>(0)   | “Large scoop but no mince was plated. Whether the utensil is incorrect or training needs to be done for staff” (Shepards pie)<br>“staff didn’t know how much was okay to give” (Roast pork)<br>“not sliced” (Smoked mackerel)<br>“only provided 1 wedge not 2” (Boiled coco yam)<br>“If serving size was correctly given it would be the right household size” (steamed green beans) | 8<br>(57.1)  |

|                |              |  |               |  |               |                                                                                                                                                                                                                                        |               |
|----------------|--------------|--|---------------|--|---------------|----------------------------------------------------------------------------------------------------------------------------------------------------------------------------------------------------------------------------------------|---------------|
|                |              |  |               |  |               |                                                                                                                                                                                                                                        |               |
|                | Sitting time |  | 0<br>(0)      |  | 0<br>(0)      | “Sitting in Bain for a while” (Angus<br>beef steak, grilled chick)<br>“sitting for a little too long”<br>(assorted veg)<br>“Needed to be stirred as it was<br>splitting.” (miso soup)<br>“separated” (meen mouile, chicken<br>rendang) | 6<br>(42.9)   |
| Total<br>n=739 |              |  | 372<br>(50.3) |  | 131<br>(17.7) |                                                                                                                                                                                                                                        | 236<br>(32.3) |

Counts and sample comments about aspects of the nutrition label, row proportions presented and column proportion for incorrect category only.

| Component                         | Correct                                                                                                                         |             | Neutral                                                                                                 |            | Incorrect                                                                                                                                                                                                      |               |          |
|-----------------------------------|---------------------------------------------------------------------------------------------------------------------------------|-------------|---------------------------------------------------------------------------------------------------------|------------|----------------------------------------------------------------------------------------------------------------------------------------------------------------------------------------------------------------|---------------|----------|
|                                   | Comment                                                                                                                         | Row n (%)   | Comment                                                                                                 | Row n (%)  | Comment                                                                                                                                                                                                        | Row n (%)     | Column % |
| Title<br>n=29                     | "is true to nutrition card" (house made baked beans)                                                                            | 3<br>(10.3) | "close to card" (stir fry veg)                                                                          | 1<br>(3.4) | "Tastes like canned baked beans with added kidney beans. Probably should just be called baked beans" (house made baked beans)                                                                                  | 25<br>(86.2)  | 6.6%     |
| Size<br>n=136                     | "For this serve size it looked to be about a cup" (roast root vegetables)<br>"Yes, 3 kernels were provided" (Baby corn kernels) | 13<br>(9.6) | "1 roll served which was approx. correct weight but card says 2 rolls" (spinach and ricotta cannelloni) | 8<br>(5.9) | "Removed amount to be half a cup and still weighed 114g" (Gari)                                                                                                                                                | 115<br>(84.6) | 30.5%    |
| Ingredient<br>n=130               | "is true to nutrition card and ingredients" (house made baked beans)                                                            | 4<br>(3.1)  | "Chilli, tomato, plantain, oil" (Plantain)                                                              | 2<br>(1.5) | "No green apple, no cinnamon" (bircher museli)<br>"No pepper crust" (pepper crusted salami)<br>"Also contains baby corn and green beans in addition to what nutrition card states" (assorted steam vegetables) | 124<br>(95.4) | 32.9%    |
| Energy and macronutrients<br>n=58 | "Oily on the plate but fat content high on card so probably reflective" (African chicken kebabs)                                | 4<br>(6.9)  | "As corrected to serving size" (Gnocchi with sage and vegetable and coconut chicken curry)              | 3<br>(5.2) | "Mine probably lower in protein as very little bacon on it" (Egg bacon and cheese muffin)<br>"More fat due to extra oil" (grilled chicken)                                                                     | 51<br>(87.9)  | 13.5%    |
| Symbols<br>n=36                   | "No gluten containing foods listed on card but has gluten free symbol." (Jerk chicken)                                          | 3<br>(8.3)  | "Seeds?" (bubble and squeak, egg white omelette)                                                        | 3<br>(8.3) | "Should say it is vegetarian but does not" (Mac and cheese pasta bake)<br>"Added corn - more energy dense" (assorted steamed vegetables)                                                                       | 30<br>(83.3)  | 8.0%     |
| Sodium<br>n=35                    | "Correct for 1roll" (Spinach and ricotta cannelloni)<br>"Looks as nutrition card indicates" (Okra with tomato gumbo)            | 2<br>(5.7)  | "close to card" (stir fry veg)                                                                          | 1<br>(2.9) | "Salt added to dish, listed as low sodium" (sautéed Kale and green beans)                                                                                                                                      | 32<br>(91.4)  | 8.5%     |

|                |  |             |  |             |  |               |      |
|----------------|--|-------------|--|-------------|--|---------------|------|
|                |  |             |  |             |  |               |      |
| Total<br>n=424 |  | 30<br>(7.0) |  | 17<br>(4.0) |  | 377<br>(88.9) | 100% |
